# Supplementary material for: ATP competes with PIP2 for binding to gelsolin
Source: PubMed Central journal article supplement (PMC6080781; doi:10.1371/journal.pone.0201826), 2018-08-07
Supplement: pone.0201826.s002.pdf [file pone.0201826.s002.pdf]

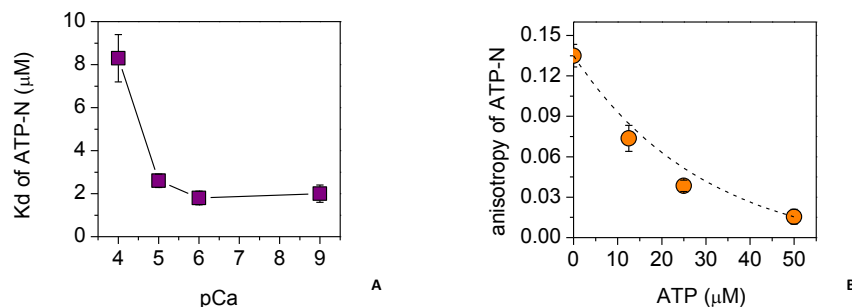

**Fig. S2. ATP binding to gelsolin under actin polymerization conditions.** (A) The calcium-dependent gelsolin binding affinity for ATP under actin polymerization conditions was determined by monitoring the change in ATP-N anisotropy on gelsolin titration at different calcium ion concentrations. Each data point arises from the  $K_d$  calculated from a titration similar to Fig 1a.  $K_d$ s were calculated to be between 1.51  $\mu\text{M}$  and 2.35  $\mu\text{M}$  in the 1 nM to 10  $\mu\text{M}$  calcium concentration range, and the value increased to  $8.05 \pm 1.32 \mu\text{M}$  above 100  $\mu\text{M}$  calcium. (B) The anisotropy of ATP-N (0.5  $\mu\text{M}$ ) bound to gelsolin (5  $\mu\text{M}$ ) was measured upon titrating with unlabeled ATP in the absence of calcium. 50  $\mu\text{M}$  ATP was sufficient to remove the gelsolin bound ATP-N. The affinity of unlabeled ATP for gelsolin, under actin polymerizing salt conditions, was calculated to be  $K_d = 2.2 \pm 0.17 \mu\text{M}$  measured by labeled/unlabeled ATP competition on gelsolin, which is similar to the affinity of ATP-N derived from Fig. S1C ( $K_d = 1.58 \pm 0.8 \mu\text{M}$ ). Data were analyzed by the method of Kubala (Kubala et al., 2004) with the modification that the change in anisotropy of ATP-N was substituted for the change in fluorescence emission as the indication of ATP competition.

## References

**Kubala, M., Plasek, J. and Amler, E.** (2004). Fluorescence competition assay for the assessment of ATP binding to an isolated domain of Na<sup>+</sup>, K<sup>(+)</sup>-ATPase. *Physiol. Res.* **53**, 109-13.
