# Supplementary material for: ATP competes with PIP2 for binding to gelsolin
Source: PubMed Central journal article supplement (PMC6080781; doi:10.1371/journal.pone.0201826), 2018-08-07
Supplement: pone.0201826.s003.pdf [file pone.0201826.s003.pdf]

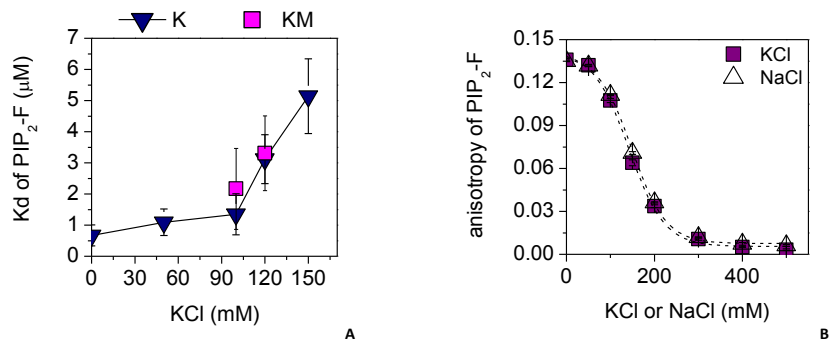

**Fig. S3.** The interplay between calcium ions, magnesium ions and ionic strength on  $\text{PIP}_2\text{-F}$  binding to gelsolin. In the absence of divalent cations, the anisotropy of  $\text{PIP}_2\text{-F}$  ( $0.5 \mu\text{M}$ ) increased with increasing gelsolin concentration and this interaction was potassium ion dependent. The  $K_d$ s calculated from the binding curves fitted with Eq. 2 showed diminishing affinities with increasing potassium ion concentrations (blue triangles). Inclusion of  $1 \text{ mM MgCl}_2$  slightly weakened the affinity of  $\text{PIP}_2\text{-F}$  for gelsolin (magenta squares) at  $100 \text{ mM}$  and  $120 \text{ mM}$  KCl (K, potassium ions, KM, potassium and magnesium ions). (B) Anisotropy of  $\text{PIP}_2\text{-F}$  ( $0.5 \mu\text{M}$ ) in the presence of gelsolin ( $5 \mu\text{M}$ ) as a function of KCl or NaCl concentration. Data were fitted with simple sigmoidal curves. The decrease in anisotropy indicates that  $\text{PIP}_2\text{-F}$  is dissociated from gelsolin by increasing potassium or sodium ion concentrations, with the half-effective concentrations of  $141.2 \pm 3.0 \text{ mM}$  and  $143.3 \pm 1.6 \text{ mM}$ , respectively. This indicates the effect of KCl on gelsolin: $\text{PIP}_2\text{-F}$  binding is largely ionic and nonspecific.
