# Supplementary material for: ATP competes with PIP2 for binding to gelsolin
Source: PubMed Central journal article supplement (PMC6080781; doi:10.1371/journal.pone.0201826), 2018-08-07
Supplement: pone.0201826.s004.pdf [file pone.0201826.s004.pdf]

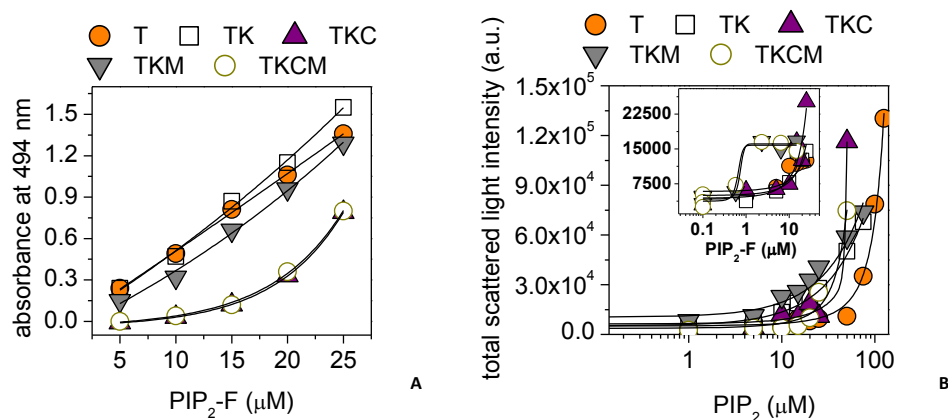

**Fig. S4.** Assessment of the solubility of PIP<sub>2</sub> and PIP<sub>2</sub>-F in the experimental buffers. (A) Determination of the actual concentrations of PIP<sub>2</sub>-F after incubation with different cations by light absorbance at 494 nm. T, 2 mM Tris-HCl, pH 7.4; K, 100 mM KCl; C, 1 mM CaCl<sub>2</sub>; M, 1 mM MgCl<sub>2</sub>. (B) Determination of critical micelle concentrations of PIP<sub>2</sub> and PIP<sub>2</sub>-F (inset) by dynamic light scattering.

It is well known that divalent cations, calcium in particular, cause PIP<sub>2</sub> to aggregate (Flanagan et al., 1997; Levental et al., 2009). Therefore, we evaluated the effects of cations on the critical micelle concentrations (CMCs) of PIP<sub>2</sub> and PIP<sub>2</sub>-F by dynamic light scattering (Huang et al., 2011). The results indicate clearly that the CMCs are affected by the cations. Calcium, but not magnesium or potassium ions, precipitated PIP<sub>2</sub>-F, causing a substantial amount of PIP<sub>2</sub>-F being removed from solution by centrifugation (Fig S4 a). After taking the changes in concentrations into account, the CMC of PIP<sub>2</sub>-F was estimated to be ~10 μM in the absence of calcium, and this value was lowered to ~ 0.5 μM in the presence of 1 mM CaCl<sub>2</sub>, either in the presence of 100 mM KCl or 100 mM KCl and 1mM MgCl<sub>2</sub> (Fig S4 b). These values are in agreement with those reported in the literature (Huang et al., 2011). Unlike PIP<sub>2</sub>-F, the actual concentrations of PIP<sub>2</sub> could not be determined photometrically. Therefore, the CMCs of PIP<sub>2</sub> reported here were estimated based on the nominal rather than the actual PIP<sub>2</sub> concentrations. The obtained values were 20 μM in the absence of cations, 2 μM and < 1 μM in the presence of 100 mM KCl or 100 mM KCl and 1 mM MgCl<sub>2</sub>, respectively, which again are in concordance with the literature data (Flanagan et al., 1997). Introduction of calcium into the buffer raised the CMC of PIP<sub>2</sub> to ~ 10 μM, which is considered as an overestimation due to likely precipitation of PIP<sub>2</sub> by calcium in a similar way to that observed for PIP<sub>2</sub>-F (Fig S4 a). Taken together, under the buffer conditions

tested, PIP<sub>2</sub>-F was free from micelle formation at concentrations of 0.5 μM or below, whereas PIP<sub>2</sub> was more sensitive to cations and had a greater tendency to form micelles than PIP<sub>2</sub>-F.

Methods: The critical micelle concentrations of PIP<sub>2</sub> and 1-(1-octadecanoyl-fluorescein-2R-octadecanoylphosphatidyl)inositol-4,5-bisphosphate (Cayman Chemical, abbreviated as PIP<sub>2</sub>-F) were determined by dynamic light scattering (Huang et al., 2011). Fifty microliter samples were prepared by serial dilution of PIP<sub>2</sub> or PIP<sub>2</sub>-F into a low salt buffer (2 mM Tris-HCl, pH 7.4), or the same buffer supplemented with 100 mM KCl, 1 mM MgCl<sub>2</sub>, and/or 1 mM CaCl<sub>2</sub>. After incubation for 30 min, the samples were centrifuged at 15,000 x g for 10 min, transferred into a 384-well clear bottom plate, and light scattering was measured using a Wyatt Dynapro plate reader at room temperature. The concentrations of PIP<sub>2</sub>-F were subsequently determined by light absorbance at 494 nm with a Nanodrop spectrophotometer.

## References

- Flanagan, L. A., Cunningham, C. C., Chen, J., Prestwich, G. D., Kosik, K. S. and Janmey, P. A.** (1997). The structure of divalent cation-induced aggregates of PIP<sub>2</sub> and their alteration by gelsolin and tau. *Biophys J* **73**, 1440-1447.
- Huang, W., Jiang, D., Wang, X., Wang, K., Sims, C. E., Allbritton, N. L. and Zhang, Q.** (2011). Kinetic Analysis of PI3K Reactions with Fluorescent PIP<sub>2</sub> Derivatives. *Anal Bioanal Chem* **401**, 1881-1888.
- Levental, I., Christian, D. A., Wang, Y.-H., Madara, J. J., Discher, D. E. and Janmey, P. A.** (2009). Calcium-dependent lateral organization in phosphatidylinositol 4,5-bisphosphate (PIP<sub>2</sub>)- and cholesterol-containing monolayers. *Biochemistry* **48**, 8241-8248.
