# Supplementary material for: ATP competes with PIP2 for binding to gelsolin
Source: PubMed Central journal article supplement (PMC6080781; doi:10.1371/journal.pone.0201826), 2018-08-07
Supplement: pone.0201826.s005.pdf [file pone.0201826.s005.pdf]

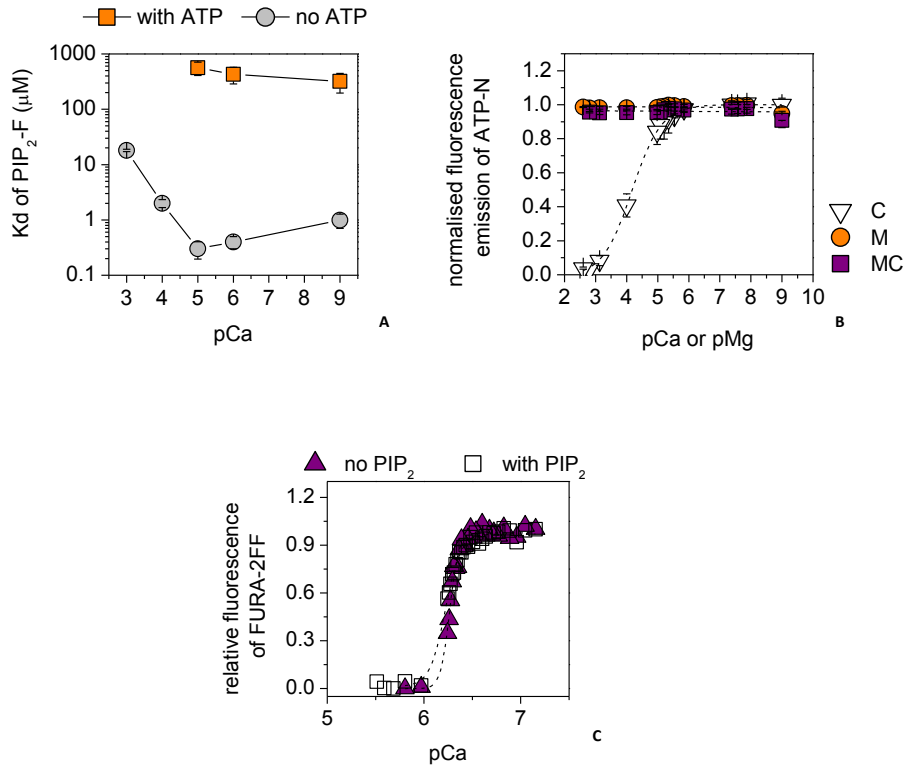

**Fig. S5.** Assessment of the effects of calcium and ATP on the binding of ATP-N and PIP<sub>2</sub>-F to gelsolin. (A) *K<sub>d</sub>*s were calculated from the fit data with Eq.2 of gelsolin:PIP<sub>2</sub>-F binding under different calcium concentrations in the absence or presence of ATP. Part of the data have been shown in Fig 1d (white triangles). In the absence of ATP, PIP<sub>2</sub>-F (0.5 μM) binds to gelsolin, as reflected by the high affinity, across a wide range of calcium concentrations. In the presence of ATP, the interaction of PIP<sub>2</sub>-F with gelsolin was very weak below 10 μM calcium (*K<sub>d</sub>* = 563.0 ± 3.6 μM at 10 μM calcium). (B) In the absence of gelsolin, calcium directly precipitates ATP-N (C, open triangles) with a half-maximum value of 70.4 ± 0.7 μM. Magnesium has no effect on the fluorescence emission of ATP-N either in the absence (M, orange circles) or presence of 10 μM calcium (MC, purple squares). Data were fitted with simple sigmoidal curves. (C) The reported FURA-2FF dissociation constant for calcium ions is 25 μM (A.G. Scientific Inc.). The calcium-dependent fluorescence emission profile of FURA-2FF (2 μM) over pCa range of 5-7 was similar in the presence and absence of 20 μM PIP<sub>2</sub>, which were fitted with simple sigmoidal curves. The half-saturation pCa values were = 6.265 ± 0.004 and 6.217 ± 0.011 in the absence and presence of PIP<sub>2</sub>, respectively, suggesting that PIP<sub>2</sub> does not interact with calcium with a *K<sub>d</sub>*

less than 25  $\mu\text{M}$ . The measurement was carried out with a Perkin Elmer LS-55 spectrofluorimeter ( $\lambda_{\text{ex}} = 340 \text{ nm}$ ,  $\lambda_{\text{em}} = 505 \text{ nm}$ ).
