# Supplementary material for: ATP competes with PIP2 for binding to gelsolin
Source: PubMed Central journal article supplement (PMC6080781; doi:10.1371/journal.pone.0201826), 2018-08-07
Supplement: pone.0201826.s006.pdf [file pone.0201826.s006.pdf]

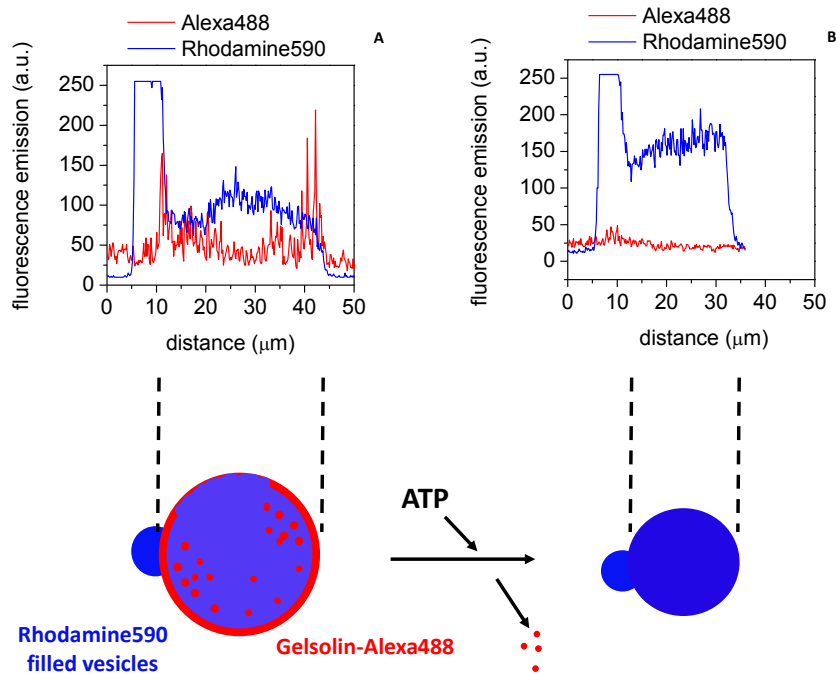

**Fig. S6.** Line scans of fluorescence intensity versus distance along the arrows shown in Fig 3*b*. (A) Profiles of gelsolin-Alexa488 (red) and PIP<sub>2</sub>-containing vesicles filled with rhodamine590 (blue) in the absence of ATP. (B) Gelsolin-Alexa488 (red) was released and the size of phospholipid vesicle (filled by rhodamine590, blue) was changed by 0.5 mM ATP treatment in Fig 3*b*.
